# Supplementary material
Source: Research Square preprint supplement (doi:10.21203/rs.3.rs-9229438/v1)
Supplement: Supplementary file 1 [file fc3db07710ca46a1896838f1.docx]

Supporting Information for

**Tailoring Plasmonic Hybrid States in Peropyrene Heterodimers by Charge Doping and Static Electric Field**

Haoran Liu1, #, Nan Gao1,2 #, Yongqi Chen1, Yurui Fang1, *

1 *School of Physics, Dalian University of Technology, Dalian* 116024*, China*

2 *Department of Physics, Zhejiang Sci-Tech University, Hangzhou,* 310018*, Zhejiang, China*

* *Corresponding authors:* [*yrfang@dlut.edu.cn*](mailto:yrfang@dlut.edu.cn) *(Y.F.)*

# *The author contributed equally.*

**Figures.**


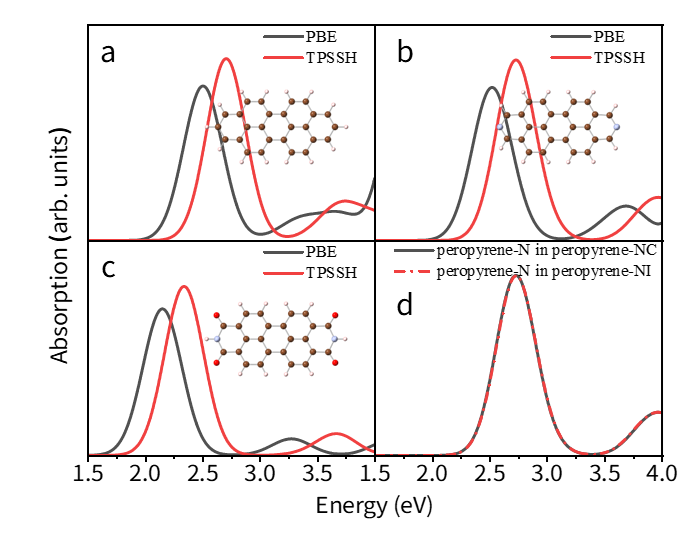


**Figure S1.** (a-c) Comparison of absorption spectra calculated with the functional adopted in this work (red lines) versus prior work (black lines) for (a) peropyrene, (b) peropyrene-N and (c) peropyrene-O. (d) Absorption spectra computed using extracted peropyrene-N coordinates from optimized peropyrene-NC (black line) and peropyrene-NO (red line) heterodimers.


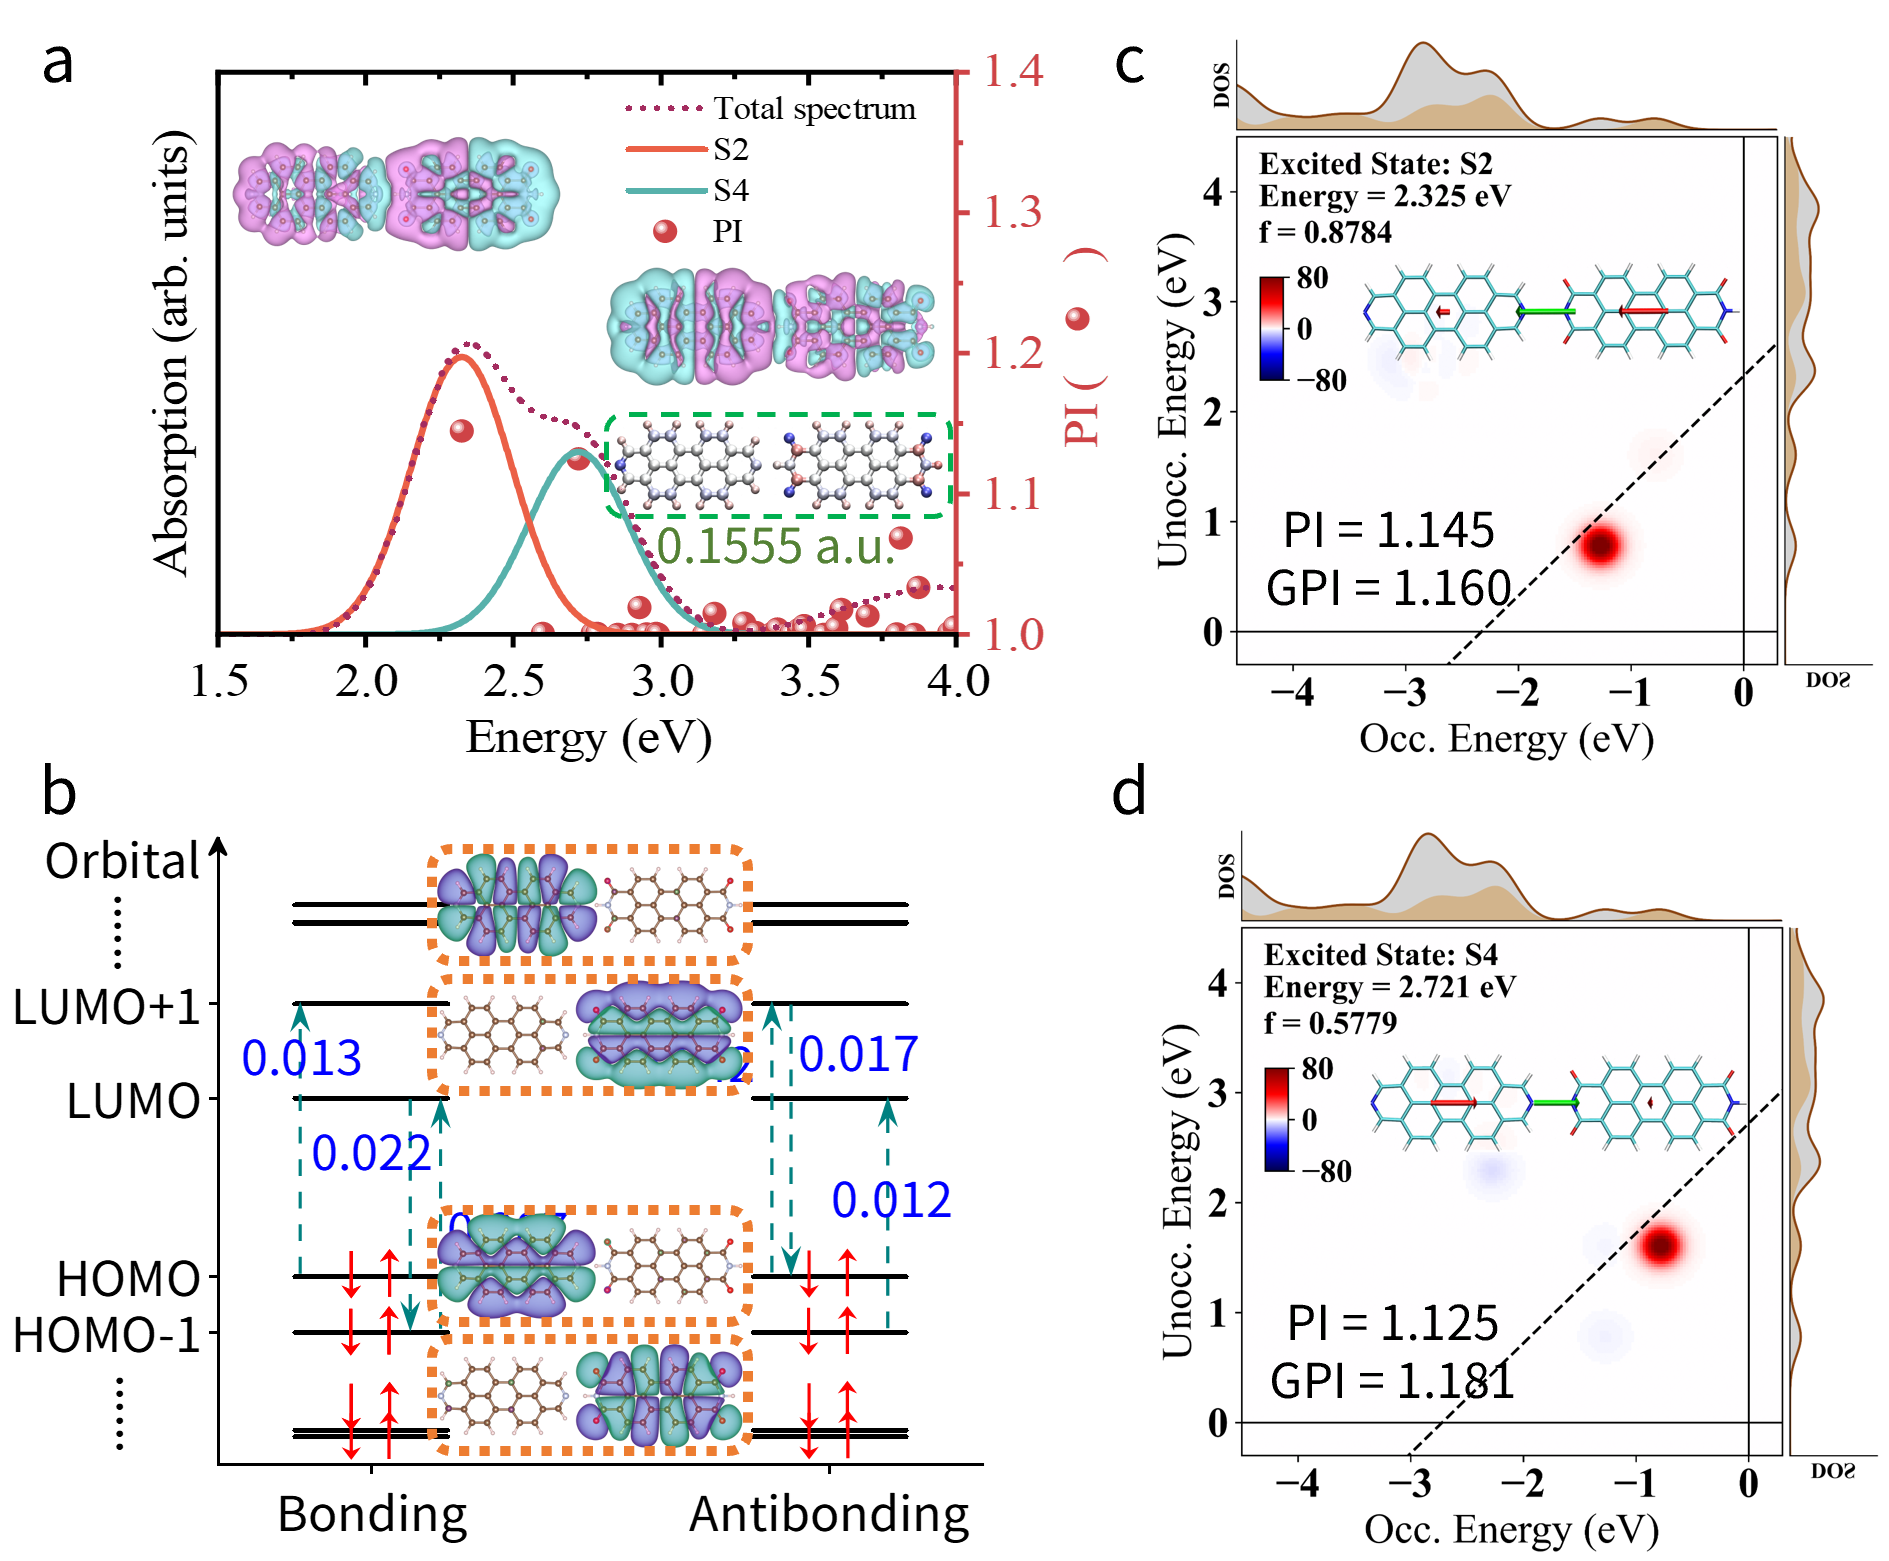


**Figure S2.** (a) Absorption spectra and corresponding PI values of peropyrene-NO, including the transition densities for both monometric and dimeric plasmonic excitation modes. The spectra indicate weak plasmonic interaction without observable hybridization effects. The inset in the lower-right corner displays the ground-state atomic charge distribution. For simplicity, we denote the low-energy plasmonic excitation as the bonding state and the high-energy excitation as the antibonding state throughout this work. (b) SPCA of bonding and antibonding states for peropyrene-NO. The dashed boxes show molecular orbital diagrams corresponding to the energy levels (bottom to top: HOMO-1, HOMO, LUMO, LUMO+1). (c-d) TCMs for the (c) bonding state and (d) antibonding state of peropyrene-NO. The insets depict the transition dipole moment contribution maps for the respective plasmonic states.


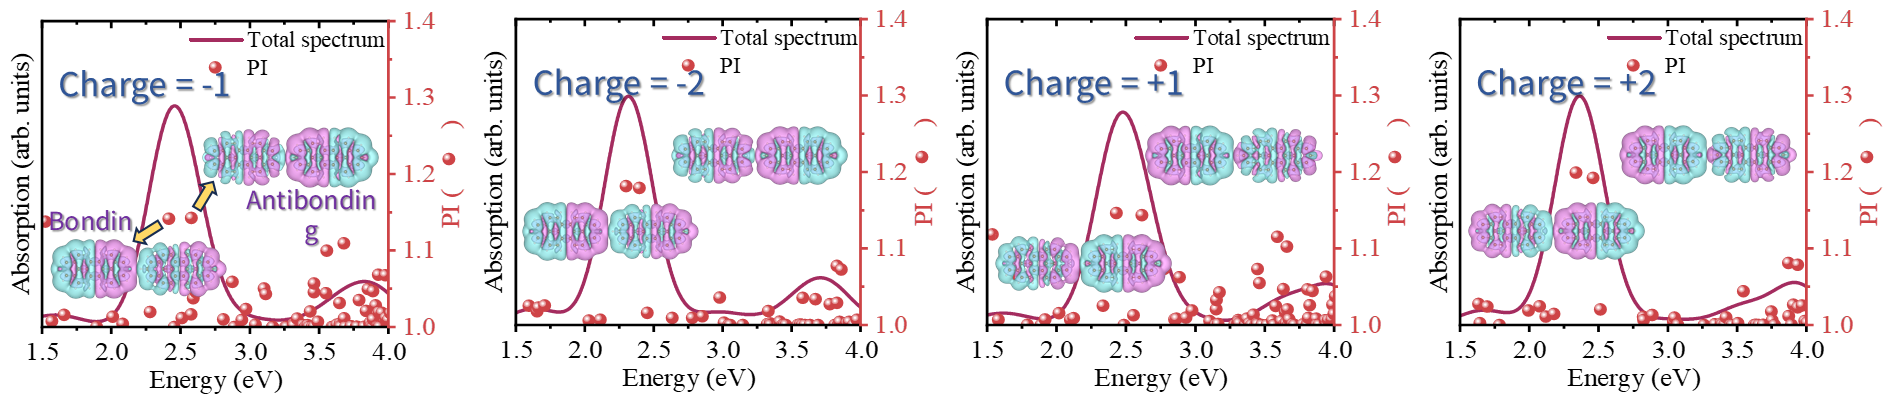


**Figure S3.** Absorption spectra and corresponding PI values of peropyrene-NC under charge doping levels from -2 to +2. The insets display the transition densities for the bonding and antibonding states.


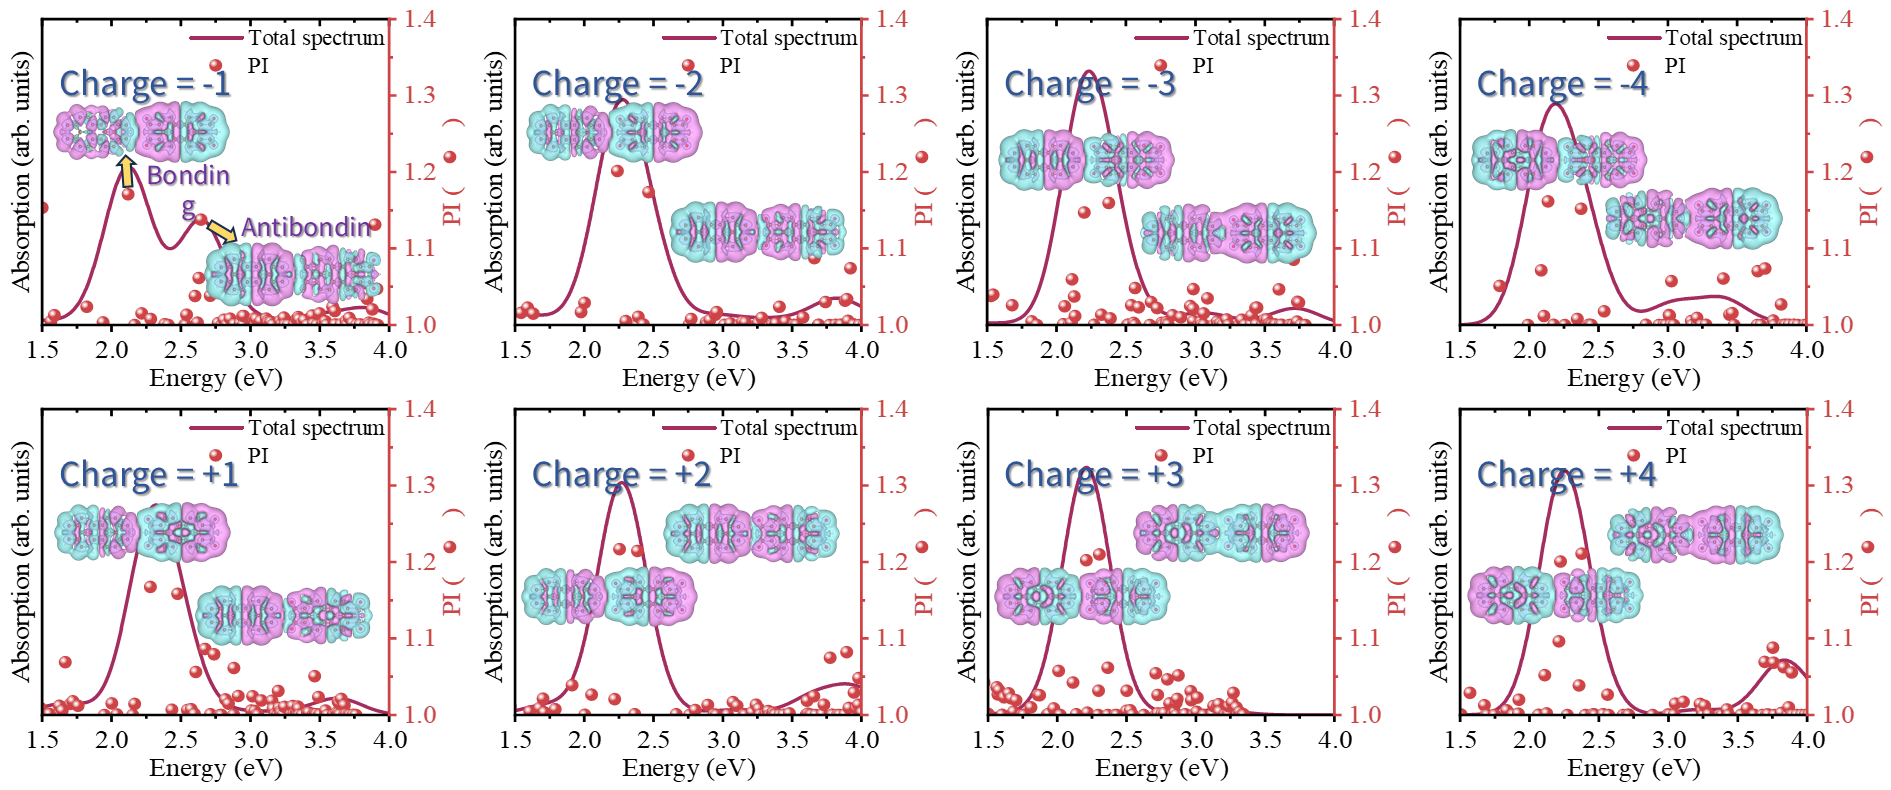


**Figure S4.** Absorption spectra and corresponding PI values of peropyrene-NO under charge doping levels from -4 to +4. The insets display the transition densities for the bonding and antibonding states.


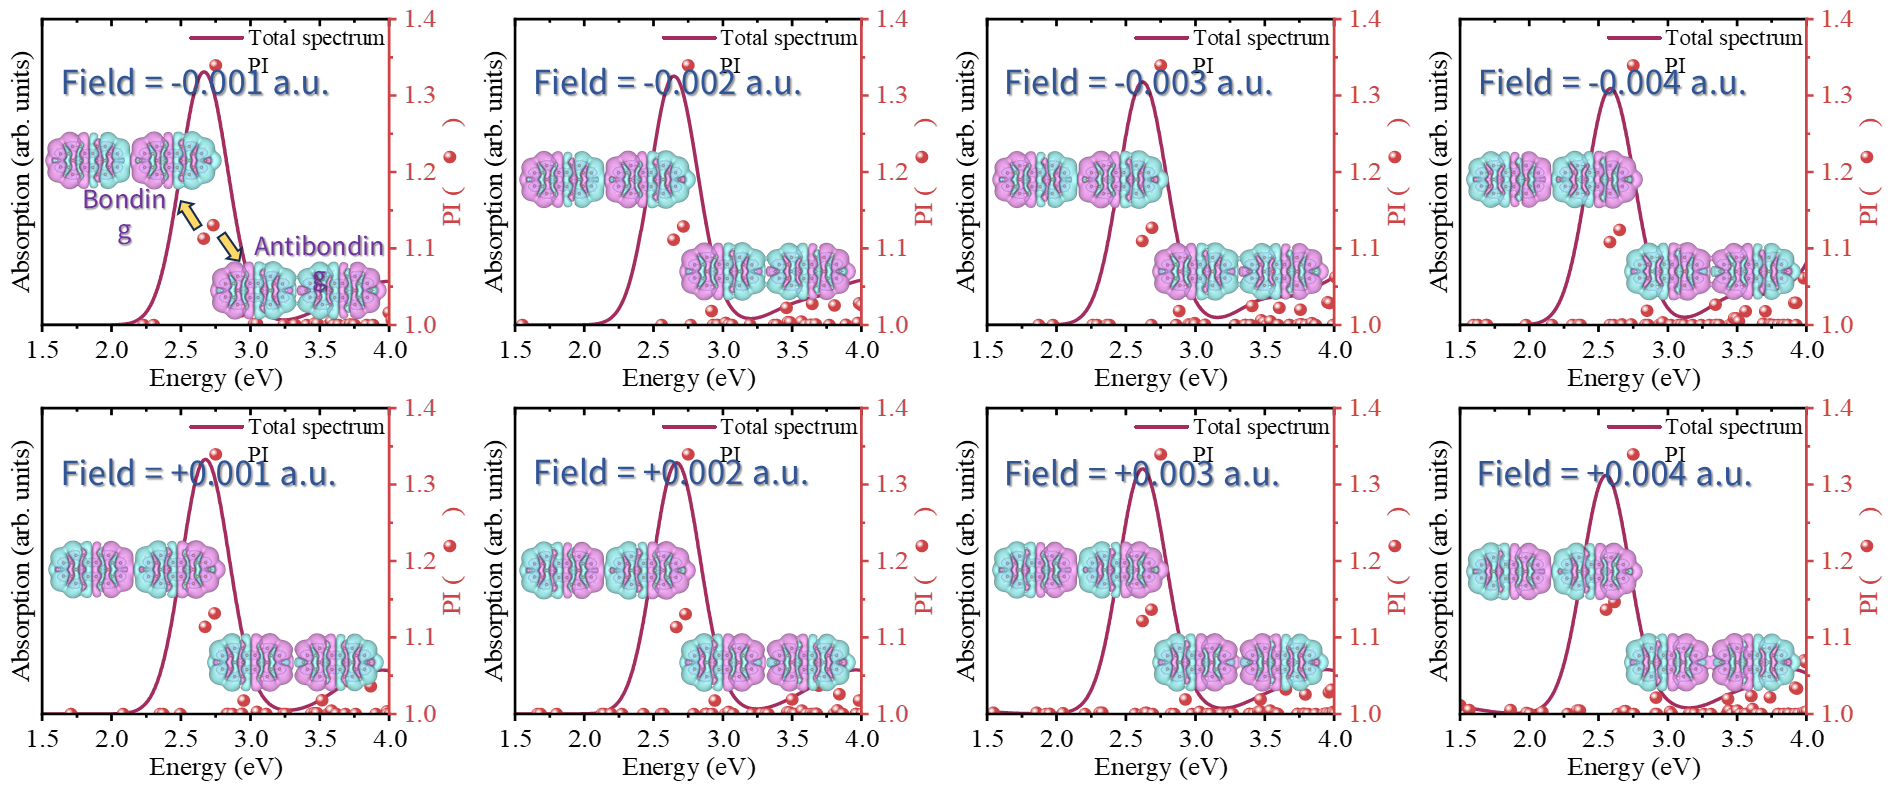


**Figure S5.** Absorption spectra and corresponding PI values of peropyrene-NC under static electric field strengths ranging from -0.004 a.u. to +0.004 a.u., with the electric field applied along the *x* direction. The insets display the transition densities for the bonding and antibonding states.


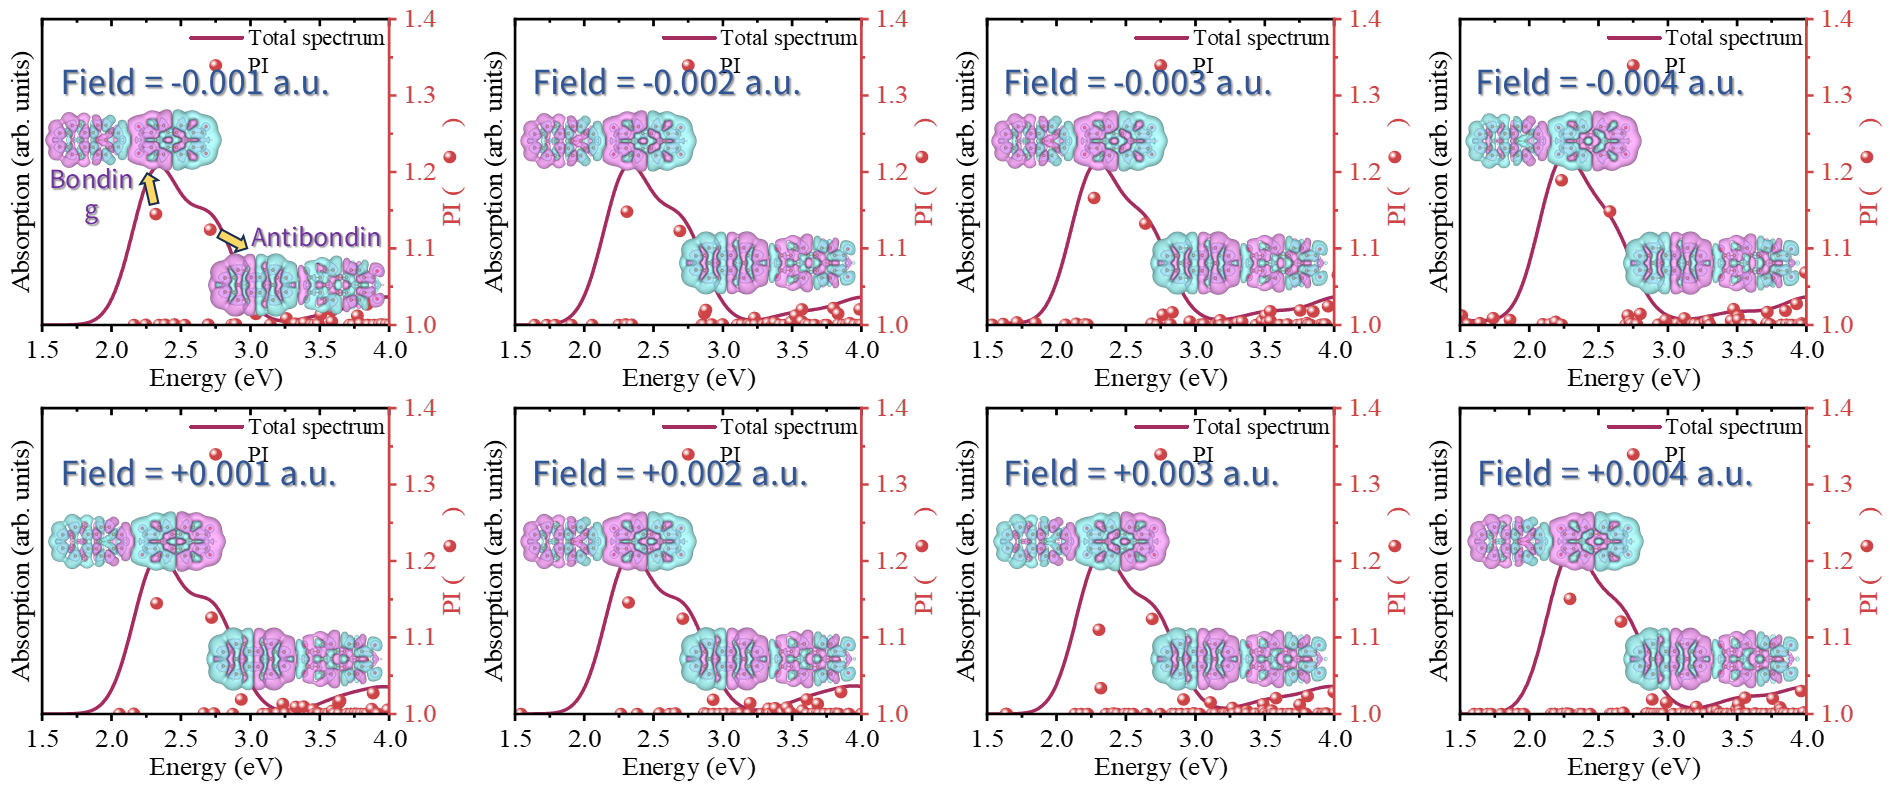


**Figure S6.** Absorption spectra and corresponding PI values of peropyrene-NO under static electric field strengths ranging from -0.004 a.u. to +0.004 a.u., with the electric field applied along the *x* direction. The insets display the transition densities for the bonding and antibonding states.


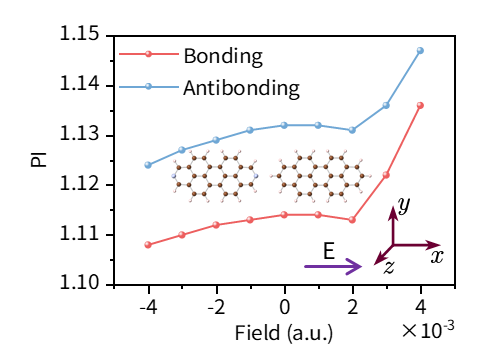


**Figure S7.** The PI values for the bonding and antibonding states plotted against applied static electric field strengths (from -0.004 a.u. to +0.004 a.u.), revealing systematic enhancement of plasmonic features with increasing field strength.

**Tables.**

**Table S1.** Calculated excitation properties of the first ten excited states for peropyrene, including excitation energies, oscillator strengths, PI values, and GPI values.

| peropyrene | | | | |
| --- | --- | --- | --- | --- |
| State | E/ev | *f* | PI | GPI |
| **S1** | **2.705** | **0.624** | **1.123** | **3.347** |
| S2 | 3.043 | 0.003 | 1.003 | 0.659 |
| S3 | 3.463 | 0.000 | 1.001 | 0.311 |
| S4 | 3.525 | 0.025 | 1.018 | 0.822 |
| S5 | 3.719 | 0.109 | 1.042 | 1.333 |
| S6 | 3.987 | 0.000 | 1.001 | 0.352 |
| S7 | 4.035 | 0.075 | 1.026 | 1.642 |
| S8 | 4.058 | 0.000 | 1.066 | 2.909 |
| S9 | 4.121 | 0.000 | 1.009 | 0.960 |
| S10 | 4.376 | 0.000 | 1.002 | 0.618 |

**Table S2.** Calculated excitation properties of the first ten excited states for peropyrene-N, including excitation energies, oscillator strengths, PI values, and GPI values.

| peropyrene-N | | | | |
| --- | --- | --- | --- | --- |
| State | E/ev | *f* | PI | GPI |
| **S1** | **2.724** | **0.607** | **1.125** | **4.106** |
| S2 | 2.960 | 0.034 | 1.017 | 1.233 |
| S3 | 3.449 | 0.000 | 1.000 | 0.286 |
| S4 | 3.471 | 0.000 | 1.000 | 0.287 |
| S5 | 3.480 | 0.000 | 1.001 | 0.395 |
| S6 | 3.582 | 0.000 | 1.005 | 0.652 |
| S7 | 3.868 | 0.086 | 1.039 | 1.567 |
| S8 | 4.010 | 0.000 | 1.004 | 0.630 |
| S9 | 4.059 | 0.088 | 1.029 | 2.141 |
| S10 | 4.083 | 0.000 | 1.068 | 3.520 |

**Table S3.** Calculated excitation properties of the first ten excited states for peropyrene-O, including excitation energies, oscillator strengths, PI values, and GPI values.

| peropyrene-O | | | | |
| --- | --- | --- | --- | --- |
| State | E/ev | *f* | PI | GPI |
| **S1** | **2.338** | **0.582** | **1.151** | **3.436** |
| S2 | 2.720 | 0.000 | 1.001 | 0.442 |
| S3 | 2.726 | 0.000 | 1.001 | 0.449 |
| S4 | 3.235 | 0.000 | 1.012 | 0.859 |
| S5 | 3.278 | 0.000 | 1.001 | 0.482 |
| S6 | 3.316 | 0.000 | 1.001 | 0.388 |
| S7 | 3.320 | 0.000 | 1.001 | 0.496 |
| S8 | 3.378 | 0.000 | 1.003 | 0.252 |
| S9 | 3.428 | 0.007 | 1.015 | 0.862 |
| S10 | 3.494 | 0.001 | 1.010 | 1.021 |

**Table S4.** Calculated excitation properties of the first fifteen excited states for peropyrene-NC, including excitation energies, oscillator strengths, PI values, and GPI values.

| Peropyrene-NC | | | | |
| --- | --- | --- | --- | --- |
| State | E/ev | *f* | PI | GPI |
| S1 | 1.639 | 0.000 | 1.000 | 0.000 |
| S2 | 2.379 | 0.000 | 1.000 | 0.000 |
| **S3** | **2.674** | **1.454** | **1.114** | **1.112** |
| **S4** | **2.743** | **0.024** | **1.132** | **1.114** |
| S5 | 2.755 | 0.000 | 1.000 | 0.000 |
| S6 | 2.908 | 0.000 | 1.000 | 0.000 |
| S7 | 2.950 | 0.033 | 1.018 | 0.328 |
| S8 | 3.025 | 0.000 | 1.000 | 0.000 |
| S9 | 3.047 | 0.002 | 1.003 | 0.213 |
| S10 | 3.049 | 0.000 | 1.000 | 0.000 |
| S11 | 3.175 | 0.000 | 1.000 | 0.000 |
| S12 | 3.443 | 0.000 | 1.000 | 0.061 |
| S13 | 3.463 | 0.001 | 1.001 | 0.104 |
| S14 | 3.480 | 0.000 | 1.001 | 0.102 |
| S15 | 3.494 | 0.002 | 1.000 | 0.001 |

**Table S5.** Calculated excitation properties of the first fifteen excited states for peropyrene-NO, including excitation energies, oscillator strengths, PI values, and GPI values.

| Peropyrene-NO | | | | |
| --- | --- | --- | --- | --- |
| State | E/ev | *f* | PI | GPI |
| S1 | 1.450 | 0.000 | 1.000 | 0.000 |
| **S2** | **2.325** | **0.878** | **1.145** | **1.160** |
| S3 | 2.600 | 0.000 | 1.001 | 0.094 |
| **S4** | **2.721** | **0.578** | **1.125** | **1.181** |
| S5 | 2.769 | 0.004 | 1.001 | 0.008 |
| S6 | 2.785 | 0.000 | 1.001 | 0.097 |
| S7 | 2.855 | 0.000 | 1.000 | 0.000 |
| S8 | 2.902 | 0.000 | 1.000 | 0.000 |
| S9 | 2.927 | 0.033 | 1.019 | 0.355 |
| S10 | 2.951 | 0.001 | 1.000 | 0.006 |
| S11 | 2.984 | 0.000 | 1.001 | 0.078 |
| S12 | 2.991 | 0.000 | 1.000 | 0.000 |
| S13 | 3.146 | 0.000 | 1.000 | 0.002 |
| S14 | 3.182 | 0.000 | 1.015 | 0.260 |
| S15 | 3.282 | 0.000 | 1.008 | 0.232 |

**Table S6.** Calculated excitation properties of the bonding and antibonding states for peropyrene-NC under charge doping levels from -2 to +2, including excitation energies, oscillator strengths, PI values, and GPI values.

| peropyrene-NC | | | | | |
| --- | --- | --- | --- | --- | --- |
| Charge | State | E/eV | *f* | PI | GPI |
| -2 | **Bonding** | **2.299** | **1.112** | **1.182** | **0.990** |
| **Antibonding** | **2.395** | **0.220** | **1.179** | **1.012** |
| -1 | Bonding | 2.414 | 0.966 | 1.142 | 1.042 |
| Antibonding | 2.577 | 0.417 | 1.143 | 1.067 |
| 0 | Bonding | 2.674 | 1.454 | 1.114 | 1.112 |
| Antibonding | 2.743 | 0.024 | 1.132 | 1.114 |
| +1 | Bonding | 2.430 | 0.937 | 1.146 | 1.055 |
| Antibonding | 2.615 | 0.442 | 1.144 | 1.076 |
| +2 | **Bonding** | **2.338** | **1.053** | **1.199** | **1.054** |
| **Antibonding** | **2.459** | **0.300** | **1.192** | **1.073** |

**Table S7.** Calculated excitation properties of the bonding and antibonding states for peropyrene-NO under charge doping levels from -4 to +4, including excitation energies, oscillator strengths, PI values, and GPI values.

| peropyrene-NO | | | | | |
| --- | --- | --- | --- | --- | --- |
| Charge | State | E/eV | *f* | PI | GPI |
| -4 | Bonding | 2.134 | 0.979 | 1.162 | 1.114 |
| Antibonding | 2.374 | 0.533 | 1.152 | 1.092 |
| -3 | Bonding | 2.200 | 1.140 | 1.147 | 1.118 |
| Antibonding | 2.376 | 0.418 | 1.160 | 1.106 |
| -2 | **Bonding** | **2.239** | **1.096** | **1.202** | **1.078** |
| **Antibonding** | **2.465** | **0.396** | **1.174** | **1.108** |
| -1 | Bonding | 2.119 | 0.907 | 1.171 | 1.131 |
| Antibonding | 2.644 | 0.597 | 1.138 | 1.160 |
| 0 | Bonding | 2.325 | 0.878 | 1.145 | 1.160 |
| Antibonding | 2.721 | 0.578 | 1.125 | 1.181 |
| +1 | Bonding | 2.280 | 0.984 | 1.168 | 1.143 |
| Antibonding | 2.477 | 0.388 | 1.159 | 1.143 |
| +2 | **Bonding** | **2.254** | **1.145** | **1.217** | **1.134** |
| **Antibonding** | **2.383** | **0.232** | **1.214** | **1.168** |
| +3 | Bonding | 2.208 | 1.353 | 1.202 | 1.192 |
| Antibonding | 2.303 | 0.044 | 1.210 | 1.231 |
| +4 | Bonding | 2.223 | 1.103 | 1.201 | 1.247 |
| Antibonding | 2.375 | 0.319 | 1.211 | 1.240 |

**Table S8.** Calculated excitation properties of the bonding and antibonding states for peropyrene-NC under static electric field strengths ranging from -0.004 a.u. to +0.004 a.u., including excitation energies, oscillator strengths, PI values, and GPI values.

| peropyrene-NC | | | | | |
| --- | --- | --- | --- | --- | --- |
| Field/a.u. | State | E/eV | *f* | PI | GPI |
| -0.004 | **Bonding** | **2.582** | **1.316** | **1.108** | **1.034** |
| **Antibonding** | **2.653** | **0.050** | **1.124** | **1.029** |
| -0.003 | Bonding | 2.616 | 1.365 | 1.110 | 1.062 |
| Antibonding | 2.687 | 0.044 | 1.127 | 1.063 |
| -0.002 | Bonding | 2.644 | 1.406 | 1.112 | 1.086 |
| Antibonding | 2.714 | 0.036 | 1.129 | 1.088 |
| -0.001 | Bonding | 2.664 | 1.437 | 1.113 | 1.104 |
| Antibonding | 2.733 | 0.030 | 1.131 | 1.105 |
| 0.000 | Bonding | 2.674 | 1.454 | 1.114 | 1.112 |
| Antibonding | 2.743 | 0.024 | 1.132 | 1.114 |
| +0.001 | Bonding | 2.674 | 1.453 | 1.114 | 1.108 |
| Antibonding | 2.742 | 0.021 | 1.132 | 1.109 |
| +0.002 | Bonding | 2.664 | 1.436 | 1.113 | 1.093 |
| Antibonding | 2.731 | 0.019 | 1.131 | 1.093 |
| +0.003 | Bonding | 2.618 | 1.406 | 1.122 | 1.065 |
| Antibonding | 2.683 | 0.007 | 1.136 | 1.069 |
| +0.004 | **Bonding** | **2.554** | **1.375** | **1.136** | **1.032** |
| **Antibonding** | **2.615** | **0.000** | **1.147** | **1.034** |

**Table S9.** Calculated excitation properties of the bonding and antibonding states for peropyrene-NO under static electric field strengths ranging from -0.004 a.u. to +0.004 a.u., including excitation energies, oscillator strengths, PI values, and GPI values.

| peropyrene-NO | | | | | |
| --- | --- | --- | --- | --- | --- |
| Field/a.u. | State | E/eV | *f* | PI | GPI |
| -0.004 | **Bonding** | **2.233** | **0.909** | **1.189** | **1.148** |
| **Antibonding** | **2.581** | **0.515** | **1.148** | **1.119** |
| -0.003 | Bonding | 2.271 | 0.888 | 1.166 | 1.160 |
| Antibonding | 2.640 | 0.535 | 1.133 | 1.131 |
| -0.002 | Bonding | 2.301 | 0.883 | 1.148 | 1.166 |
| Antibonding | 2.689 | 0.554 | 1.123 | 1.150 |
| -0.001 | Bonding | 2.319 | 0.875 | 1.145 | 1.157 |
| Antibonding | 2.710 | 0.572 | 1.125 | 1.175 |
| 0.000 | Bonding | 2.325 | 0.878 | 1.145 | 1.160 |
| Antibonding | 2.721 | 0.578 | 1.125 | 1.181 |
| +0.001 | Bonding | 2.325 | 0.877 | 1.145 | 1.157 |
| Antibonding | 2.721 | 0.582 | 1.126 | 1.188 |
| +0.002 | Bonding | 2.320 | 0.884 | 1.146 | 1.156 |
| Antibonding | 2.711 | 0.568 | 1.125 | 1.168 |
| +0.003 | Bonding | 2.304 | 0.691 | 1.110 | 0.875 |
| Antibonding | 2.690 | 0.554 | 1.124 | 1.151 |
| +0.004 | **Bonding** | **2.293** | **0.901** | **1.151** | **1.153** |
| **Antibonding** | **2.661** | **0.520** | **1.121** | **1.103** |
